# Supplementary material for: Tramesan Elicits Durum Wheat Defence Against the Septoria Leaf Blotch Complex
Source: Preprints.org preprint supplement (doi:10.20944/preprints202003.0090.v1), 2020-03-05
Supplement: Supplementary file 1 [file supplementary]

## Sheet: Sheet1
	Sample				SA Results	NAA (ISTD) Results	JA Results	NAA (ISTD) Results
	Name	Level	Type	Data File	Area	Area	Area	Area	SA anormalised area	JA normalised area	SA standard curve in the range 10-3 -10 µM= y = 3432,2x R² = 0,9973	JA standard curve in the range 10-3 -10 µM= y = 541x R² = 0,9968
CT-	C-48		Sample	C-48.d	1004.09	415.494	20.887	415.494	1939.49	40.345	0.565086	0.0745749
	C0H		Sample	C0H.d	599.424	709.43	28.809	709.43	678.114	32.591	0.197574	0.0602421
	C6G		Sample	C6G.d	2888.8	57.6673	70.6286	57.6673	40203.8	982.947	11.7137	1.81691
	C7G		Sample	C7G.d	3516.52	741.408	29.9468	741.408	3806.58	32.4169	1.10908	0.0599204
	C9G		Sample	C10G.d	2260.57	802.563	128.167	802.563	2260.57	128.167	0.658635	0.236907
T	T-48		Sample	T-48.d	4317.54	393.198	22.6788	393.198	6735.53	35.3797	1.96245	0.0653968
	T0H		Sample	T0H.d	913.505	613.403	31.6876	613.403	913.505	31.6876	0.266157	0.0585724
	T6G		Sample	T6G.d	2831.33	561.119	77.4814	561.119	3095.15	84.701	0.901799	0.156564
	T7G		Sample	T7G.d	2753.69	516.056	40.5064	516.056	3273.14	48.1474	0.953656	0.088997
	T9G		Sample	T10G.d	3342.86	547.487	90.1298	547.487	3745.34	100.981	1.09124	0.186657
Parastagonospora nodorum	T+INF-48		Sample	T+INF-48.d	1293.62	458.539	32.6665	458.539	1396.02	35.2524	0.406741	0.0651615
	T+INF0H		Sample	T+INF0H.d	2574.14	494.836	51.8565	494.836	2574.14	51.8565	0.749996	0.0958531
	T+INF6G		Sample	T+INF6G.d	2848.86	413.037	96.9036	413.037	3413.06	116.095	0.994422	0.214593
	T+INF7G		Sample	T+INF7G.d	4051.17	477.489	47.2685	477.489	4198.35	48.9857	1.22322	0.0905466
	T+INF9G		Sample	T+INF10G.d	2297.6	449.914	122.326	449.914	2527.01	134.54	0.736265	0.248687
	INF-48		Sample	INF-48.d	1774.11	366.02	39.7122	366.02	2398.49	53.6884	0.698821	0.0992393
	INF0H		Sample	INF0H.d	1196.43	377.094	32.123	377.094	1570	42.1531	0.457434	0.0779169
	INF6G		Sample	INF6G.d	3283.23	388.812	62.0849	388.812	4178.52	79.0148	1.21745	0.146053
	INF7G		Sample	INF7G.d	4085.37	338.573	31.4541	338.573	5970.91	45.9713	1.73967	0.0849747
	INF9G		Sample	INF10G.d	2743.31	320.555	85.7295	310.245	4234.8	132.339	1.23384	0.24462
Zymoseptoria tritici	T+INF-48		Sample	T+INF-48.d	891.527	402.567	28.5699	458.539	964.166	30.8976	0.280918	0.0571121
	T+INF0H		Sample	T+INF0H.d	2105.55	435.367	45.5899	494.836	2105.55	45.5899	0.613469	0.0842696
	T+INF6G		Sample	T+INF6G.d	2456.59	395.656	106.125	413.037	2703.15	116.777	0.787586	0.215854
	T+INF7G		Sample	T+INF7G.d	3658.6	415.257	32.5557	477.489	3835.78	34.1323	1.11759	0.0630911
	T+INF9G		Sample	T+INF10G.d	1856.24	422.567	152.459	449.914	1912.46	157.077	0.557212	0.290346
	INF-48		Sample	INF-48.d	695.59	388.366	20.3266	366.02	779.771	22.7866	0.227193	0.0421193
	INF0H		Sample	INF0H.d	1025.37	375.326	30.2568	377.094	1189.4	35.097	0.346541	0.0648744
	INF6G		Sample	INF6G.d	2658.26	402.326	58.659	388.812	2876.57	63.4764	0.838112	0.117332
	INF7G		Sample	INF7G.d	3859.36	415.237	55.3667	338.573	4046.46	58.0508	1.17897	0.107303
	INF9G		Sample	INF10G.d	2013.23	385.237	65.2556	310.245	2275.21	73.7472	0.662902	0.136316

## Sheet: ValueList_Helper
Sample
Blank
Cal
QC
CC
DoubleBlank
MatrixSpike
MatrixSpikeDup
MatrixBlank
TuneCheck
ResponseCheck
